# Supplementary material
Source: PubMed Central journal article supplement (PMC2141804)
Supplement: pnas_0704501104_1.pdf [file pnas_0704501104_1.pdf]

### HTH

|                              |   |          |     |      |        |        |       |      |    |      |      |    |     |      |     |     |    |    |      |       |   |   |   |       |    |   |   |   |   |   |   |   |    |   |    |    |   |    |   |   |   |   |   |   |   |   |   |   |   |   |       |   |       |       |   |   |       |   |   |   |   |       |    |       |       |    |       |    |   |   |   |   |   |   |   |   |   |   |   |   |   |   |   |   |   |   |   |   |   |   |   |   |   |       |   |   |   |   |   |       |     |
|------------------------------|---|----------|-----|------|--------|--------|-------|------|----|------|------|----|-----|------|-----|-----|----|----|------|-------|---|---|---|-------|----|---|---|---|---|---|---|---|----|---|----|----|---|----|---|---|---|---|---|---|---|---|---|---|---|---|-------|---|-------|-------|---|---|-------|---|---|---|---|-------|----|-------|-------|----|-------|----|---|---|---|---|---|---|---|---|---|---|---|---|---|---|---|---|---|---|---|---|---|---|---|---|---|-------|---|---|---|---|---|-------|-----|
| RapE <i>B. thuringiensis</i> | 1 | .....MGA | YIM | VSVK | GNEQLT | SLNDWY | RAML  | SQQV | I  | KATN | LKKK | ID | EK  | INKL | SI  | E   | P  | DQ | EHQD | QN    | L | L | L | L     | 64 |   |   |   |   |   |   |   |    |   |    |    |   |    |   |   |   |   |   |   |   |   |   |   |   |   |       |   |       |       |   |   |       |   |   |   |   |       |    |       |       |    |       |    |   |   |   |   |   |   |   |   |   |   |   |   |   |   |   |   |   |   |   |   |   |   |   |   |   |       |   |   |   |   |   |       |     |
| RapA <i>B. thuringiensis</i> | 1 | .....MG  | ADV | T    | REQMKH | SDDWYR | VMLQV | I    | E  | KAT  | EMK  | EE | DNK | I    | S   | G   | L  | D  | V    | ..... | D | Q | L | S     | 52 |   |   |   |   |   |   |   |    |   |    |    |   |    |   |   |   |   |   |   |   |   |   |   |   |   |       |   |       |       |   |   |       |   |   |   |   |       |    |       |       |    |       |    |   |   |   |   |   |   |   |   |   |   |   |   |   |   |   |   |   |   |   |   |   |   |   |   |   |       |   |   |   |   |   |       |     |
| RapC <i>B. subtilis</i>      | 1 | .....MK  | GV  | I    | PS     | SAV    | GQK   | I    | EW | YR   | I    | RT | FS  | P    | DAE | VLK | AE | IQ | ELK  | H     | M | Q | H | ..... | 52 |   |   |   |   |   |   |   |    |   |    |    |   |    |   |   |   |   |   |   |   |   |   |   |   |   |       |   |       |       |   |   |       |   |   |   |   |       |    |       |       |    |       |    |   |   |   |   |   |   |   |   |   |   |   |   |   |   |   |   |   |   |   |   |   |   |   |   |   |       |   |   |   |   |   |       |     |
| NprR <i>B. thuringiensis</i> | 1 | -MQQT    | LEK | I    | G      | KQ     | V     | F    | Y  | K    | R    | L  | Q   | K    | M   | T   | Q  | E  | L    | C     | G | G | I | C     | V  | Y | L | S | K | I | E | N | -G | K | I  | E  | A | S  | E | E | I | L | Q | L | L | C | A | R | E | I | A     | V | D     | L     | R | D | V     | E | E | D | V | K     | G  | L     | D     | E  | W     | L  | N | A | L | V | H | L | D | K | P | Q | V | E | R | I | Y | E | L | Q | G | E | M | K | H | V | L | ..... | D | F | E | I | T | ..... | 112 |
| T reg E. faecalis            | 1 | .....M   | N   | S    | L      | G      | A     | V    | I  | K    | E    | R  | K   | N    | R   | K   | L  | T  | O    | K     | M | L | S | E     | D  | I | C | S | O | S | Q | I | S  | K | I  | E  | N | -N | E | E | L | P | N | V | L | M | Q | L | C | D | R     | L | G     | V     | I | V | D     | G | I | M | R | Y     | K  | S     | ..... | 66 |       |    |   |   |   |   |   |   |   |   |   |   |   |   |   |   |   |   |   |   |   |   |   |   |   |   |   |       |   |   |   |   |   |       |     |
| DNAbd B. anthracis           | 1 | .....M   | F   | Y    | D      | L      | G     | I    | T  | K    | E    | L  | R   | I    | K   | N   | I  | S  | O    | S     | E | L | C | H     | G  | I | C | S | O | S | Q | I | S  | K | I  | E  | N | -G | V | I | P | S | S | I | L | L | Y | L | S | E | R     | L | G     | I     | D | P | N     | I | F | N | L | ..... | 66 |       |       |    |       |    |   |   |   |   |   |   |   |   |   |   |   |   |   |   |   |   |   |   |   |   |   |   |   |   |   |       |   |   |   |   |   |       |     |
| PicR <i>B. thuringiensis</i> | 1 | .....M   | Q   | A    | E      | K      | L     | G    | S  | E    | K    | I  | R   | V    | L   | R   | L  | T  | O    | K     | L | S | E | N     | I  | C | H | O | E | V | S | R | I  | E | S  | -G | A | V  | Y | P | S | M | D | I | L | O | G | I | A | A | L     | Q | I     | ..... | P | I | H     | F | E | V | L | I     | Y  | ..... | 69    |    |       |    |   |   |   |   |   |   |   |   |   |   |   |   |   |   |   |   |   |   |   |   |   |   |   |   |   |       |   |   |   |   |   |       |     |
| PrgX E. faecalis             | 1 | .....M   | F   | K    | I      | G      | S     | V    | L  | K    | Q    | I  | R   | Q    | E   | L   | N  | H  | I    | D     | L | Y | S | G     | I  | M | K | N | V | V | I | K | V  | E | A  | -D | S | R  | P | I | S | V | E | E | L | S | K | F | S | R | L     | G | V     | ..... | N | F | F     | E | L | N | R | A     | G  | M     | ..... | 67 |       |    |   |   |   |   |   |   |   |   |   |   |   |   |   |   |   |   |   |   |   |   |   |   |   |   |   |       |   |   |   |   |   |       |     |
| TraA E. faecalis             | 1 | .....M   | H   | L    | N      | E      | L     | M    | K  | I    | Q    | R  | K   | S    | E   | L   | K  | S  | O    | A     | K | F | Y | E     | G  | I | F | Q | R | N | S | A | S  | L | F  | E  | N | H  | E | H | F | L | K | I | A | D | L | P | I | L | A     | D | R     | S     | N | L | ..... | T | P | E | I | R     | T  | C     | N     | E  | ..... | 67 |   |   |   |   |   |   |   |   |   |   |   |   |   |   |   |   |   |   |   |   |   |   |   |   |   |       |   |   |   |   |   |       |     |
| T act L. monocytogenes       | 1 | .....M   | V   | A    | Y      | G      | E     | L    | R  | E    | V    | R  | L   | S    | K   | L   | T  | O  | K    | E     | V | Y | T | G     | V  | S | K | E | Y | A | I | G | F  | E | K  | -G | K | H  | D | I | T | L | V | L | F | E | E | I | L | R | V     | M | ..... | S     | S | D | E     | F | F | M | N | R     | G  | ..... | 67    |    |       |    |   |   |   |   |   |   |   |   |   |   |   |   |   |   |   |   |   |   |   |   |   |   |   |   |   |       |   |   |   |   |   |       |     |
| T reg L. casei               | 1 | .....M   | E   | K    | I      | G      | E     | L    | I  | N    | H    | F  | R   | E    | N   | K   | M  | S  | O    | A     | E | S | E | L     | G  | I | S | K | A | L | S | F | E  | R | -D | L  | T | K  | I | S | V | D | K | F | A | L | L | E | R | L | H     | V | ..... | T     | F | E | G     | N | A | L | I | ..... | 67 |       |       |    |       |    |   |   |   |   |   |   |   |   |   |   |   |   |   |   |   |   |   |   |   |   |   |   |   |   |   |       |   |   |   |   |   |       |     |
| RggD S. gorondii             | 1 | .....M   | T   | Q    | L      | G      | Q     | V    | F  | R    | F    | R  | E   | A    | R   | H   | S  | L  | S    | E     | A | T | G | G     | F  | S | K | M | L | S | R | F | E  | N | -G | Q  | S | L  | S | A | Q | L | F | S | A | L | S | A | H | T | ..... | E | E     | E     | F | T | V     | A | A | G | I | ..... | 67 |       |       |    |       |    |   |   |   |   |   |   |   |   |   |   |   |   |   |   |   |   |   |   |   |   |   |   |   |   |   |       |   |   |   |   |   |       |     |
| Mutr S. mutans               | 1 | MKVNQ    | S   | M    | E      | L      | G     | E    | L  | R    | E    | L  | R   | I    | A   | R   | G  | L  | K    | I     | K | D | I | A     | C  | K | N | L | S | K | Q | L | S  | R | F  | E  | N | -G | Q | T | M | L | A | A | K | L | L | A | S | G | H     | M | ..... | S     | F | S | F     | G | Y | A | L | S     | H  | ..... | 72    |    |       |    |   |   |   |   |   |   |   |   |   |   |   |   |   |   |   |   |   |   |   |   |   |   |   |   |   |       |   |   |   |   |   |       |     |

oooo

|                              |     |                |       |        |   |   |   |   |   |   |   |   |   |   |   |   |   |   |   |       |       |       |       |       |   |   |   |   |   |   |   |       |   |       |       |       |       |       |       |       |       |   |   |       |   |   |   |       |   |   |   |   |   |       |       |       |       |       |   |       |   |   |       |   |       |       |     |       |       |       |       |       |       |       |       |       |     |   |       |       |   |   |   |       |     |       |     |       |     |       |     |
|------------------------------|-----|----------------|-------|--------|---|---|---|---|---|---|---|---|---|---|---|---|---|---|---|-------|-------|-------|-------|-------|---|---|---|---|---|---|---|-------|---|-------|-------|-------|-------|-------|-------|-------|-------|---|---|-------|---|---|---|-------|---|---|---|---|---|-------|-------|-------|-------|-------|---|-------|---|---|-------|---|-------|-------|-----|-------|-------|-------|-------|-------|-------|-------|-------|-------|-----|---|-------|-------|---|---|---|-------|-----|-------|-----|-------|-----|-------|-----|
| RapE <i>B. thuringiensis</i> | 65  | YYSLLEFRYKVLTD | ..... | .....G | I | Q | N | S | F | D | T | I | S | D | Y | M | P | T | D | Q     | F     | L     | R     | F     | Y | H | F | F | K | S | I | H     | S | T     | F     | I     | S     | N     | ..... | Y     | T     | E | A | E     | H | Y | K | L     | A | E | K | I | L | V     | A     | I     | P     | D     | E | ..... | E | H | A     | E | F     | Y     | R   | I     | A     | T     | F     | Y     | H     | T     | ..... | Y     | N   | N | L     | ..... | A | S | I | E     | Y   | A     | N   | K     | R   | ..... | 170 |
| RapA <i>B. thuringiensis</i> | 53  | YFTLLDFRYKMLTD | ..... | .....N | I | K | E | N | S | F | R | I | E | S | F | E | I | P | T | G     | F     | L     | A     | Y     | Y | H | F | F | K | G | I | Y     | C | T     | S     | M     | S     | K     | ..... | Y     | S     | D | A | K     | S | E | Y | E     | K | A | N | L | K | Y     | A     | S     | H     | ..... | E | N     | A | E | F     | D | Y     | R     | M   | G     | N     | F     | Y     | Q     | T     | ..... | Y     | Q     | O   | V | ..... | N     | A | I | D | L     | R   | K     | A   | ..... | 158 |       |     |
| RapC <i>B. subtilis</i>      | 53  | YSLMEFRHQLMLDY | ..... | .....P | S | L | S | E | L | S | R | N | I | D | S | Q | A | D | L | K     | L     | D     | Y     | Y     | N | F | R | M | G | Y | F | D     | K | R     | E     | F     | ..... | F     | I     | S     | A     | I | Y | Q     | A | E | K | L     | S | F | A | D | H | ..... | E     | A     | E     | F     | Y | K     | I | E | A     | E | Y     | Y     | M   | ..... | Q     | K     | T     | Y     | ..... | F     | S     | L     | I   | N | I     | K     | N | A | Y | ..... | 169 |       |     |       |     |       |     |
| NprR <i>B. thuringiensis</i> | 113 | YKLLYTRYLMMKRD | ..... | .....P | A | V | E | E | E | L | R | L | K | Y | V | Y | K | S | P | Q     | K     | M     | L     | Y     | T | N | K | A | L | L | S | V     | Q | Y     | K     | ..... | Y     | T     | A     | L     | Y     | E | L | L     | K | T | E | A     | M | A | K | E | L | G     | ..... | Y     | E     | T     | G | I     | Y | N | N     | A | L     | Y     | T   | S     | Q     | M     | ..... | E     | I     | D     | H     | ..... | M   | T | L     | F     | A | N | V | A     | L   | ..... | 216 |       |     |       |     |
| T reg E. faecalis            | 67  | .....G         | D     | V      | H | V | V | T | S | F | E | K | M | A | E | F | R | H | K | ..... | Y     | ..... | Q     | L     | L | N | Y | K | E | R | I | ..... | E | E     | Q     | L     | Y     | ..... | L     | O     | T     | D | W | Q     | Y | Y | Y | L     | G | S | C | E | L | ..... | F     | V     | L     | N     | D | ..... | Y | E | K     | A | I     | A     | S   | L     | R     | ..... | 136   |       |       |       |       |       |     |   |       |       |   |   |   |       |     |       |     |       |     |       |     |
| DNAbd B. anthracis           | 70  | .....K         | F     | F      | K | Y | T | E | N | V | K | C | I | M | K | D | C | I | R | H     | Q     | ..... | Y     | ..... | K | E | L | Y | I | V | T | K     | E | N     | L     | N     | F     | R     | M     | K     | E     | D | W | Q     | L | I | W | H     | E | A | I | A | I | Y     | R     | ..... | N     | I     | K | T     | A | L | T     | L | N     | ..... | 139 |       |       |       |       |       |       |       |       |       |     |   |       |       |   |   |   |       |     |       |     |       |     |       |     |
| PicR <i>B. thuringiensis</i> | 70  | .....S         | D     | I      | E | R | K | Q | F | K | D | Q | V | I | M | L | C | Q | K | R     | ..... | Y     | ..... | K     | E | L | Y | N | K | V | M | E     | L | K     | ..... | E     | E     | Y     | H     | ..... | P     | E | F | Q     | Q | L | O | W     | Q | Y | V | A | A | L     | ..... | K     | K     | V     | D | ..... | Y | E | Y     | C | I     | L     | E   | K     | ..... | 139   |       |       |       |       |       |       |     |   |       |       |   |   |   |       |     |       |     |       |     |       |     |
| PrgX E. faecalis             | 68  | .....N         | T     | K      | S | V | N | E | T | G | K | E | L | I | S | K | L | E | T | N     | P     | ..... | Y     | ..... | L | F | D | K | N | E | R | L     | P | K     | R     | ..... | L     | T     | ..... | S     | L     | O | Y | F     | S | I | L | G     | Y | S | I | A | H | H     | V     | N     | ..... | E     | V | T     | N | K | T     | I | S     | D     | K   | ..... | 179   |       |       |       |       |       |       |       |     |   |       |       |   |   |   |       |     |       |     |       |     |       |     |
| TraA E. faecalis             | 68  | .....D         | F     | K      | S | V | F | D | K | L | E | T | Y | F | V | L | S | K | I | Q     | N     | P     | O     | S     | E | Y | N | Q | E | L | S | L     | Y | Q     | K     | S     | I     | ..... | H     | E     | K     | F | T | ..... | S | L | K | Y     | M | N | L | I | K | L     | Q     | T     | S     | S     | L | S     | I | S | E     | I | ..... | P     | V   | D     | K     | L     | A     | D     | K     | ..... | 146   |       |     |   |       |       |   |   |   |       |     |       |     |       |     |       |     |
| T act L. monocytogenes       | 68  | .....Y         | S     | L      | A | E | E | D | N | F | W | Y | K | F | A | N | A | N | Q | S     | L     | A     | D     | L     | Q | E | L | Y | Q | E | V | L     | Q | T     | G     | D     | R     | A     | N     | L     | R     | K | A | ..... | V | H | S | R     | M | E | I | N | E | Q     | L     | L     | N     | N     | R | F     | D | V | S     | I | V     | S     | E   | K     | D     | K     | A     | V     | I     | Q     | T     | ..... | 145 |   |       |       |   |   |   |       |     |       |     |       |     |       |     |
| T reg L. casei               | 68  | .....Q         | E     | R      | L | Y | E | Q | A | I | L | E | D | I | T | K | A | V | I | N     | N     | K     | ..... | D     | Q | A | L | V | K | E | R | A     | E | Q     | H     | L     | ..... | K     | K     | H     | ..... | G | K | Y     | Q | N | L | I     | M | V | K | A | M | I     | C     | D     | M     | ..... | E | K     | G | T | ..... | L | P     | K     | A   | D     | T     | K     | V     | L     | A     | ..... | 139   |       |     |   |       |       |   |   |   |       |     |       |     |       |     |       |     |
| RggD S. gorondii             | 68  | .....Q         | D     | H      | S | K | E | L | L | N | Q | I | Q | E | L | L | Q | T | N | Q     | L     | N     | ..... | L     | L | E | K | L | Y | L | E | K     | K | I     | S     | ..... | O     | K     | S     | K     | ..... | E | N | D     | W | V | E | R     | L | I | V | K | A | L     | C     | A     | L     | ..... | K | E     | S | E | K     | A | S     | ..... | D   | E     | L     | F     | H     | ..... | 140   |       |       |       |     |   |       |       |   |   |   |       |     |       |     |       |     |       |     |
| Mutr S. mutans               | 73  | .....Y         | E     | E      | S | D | F | F | K | R | G | H | K | L | S | E | L | Y | A | Q     | K     | I     | G     | L     | K | L | L | F | N | D | N | H     | E | ..... | Y     | I     | F     | ..... | D     | V     | Y     | N | R | L     | N | L | Y | ..... | Q | Q | T | I | H | L     | D     | T     | O     | Y     | I | ..... | S | D | D     | K | N     | F     | L   | T     | ..... | 143   |       |       |       |       |       |       |     |   |       |       |   |   |   |       |     |       |     |       |     |       |     |

\*

|                              |     |   |   |   |   |   |   |   |       |   |   |   |   |       |   |   |   |   |   |   |   |   |   |   |   |   |   |   |   |       |   |   |   |   |   |   |   |   |   |   |   |   |   |   |   |       |   |       |   |   |   |   |   |   |   |   |   |   |   |   |   |   |   |   |   |   |   |   |   |   |   |   |   |   |   |   |   |   |   |
|------------------------------|-----|---|---|---|---|---|---|---|-------|---|---|---|---|-------|---|---|---|---|---|---|---|---|---|---|---|---|---|---|---|-------|---|---|---|---|---|---|---|---|---|---|---|---|---|---|---|-------|---|-------|---|---|---|---|---|---|---|---|---|---|---|---|---|---|---|---|---|---|---|---|---|---|---|---|---|---|---|---|---|---|---|
| RapE <i>B. thuringiensis</i> | 171 | A | I | F | S | K | Y | E | ..... | G | Y | E | V | ..... | K | T | A | F | C | N | S | L | G | G | C | I | Y | L | K | ..... | Y | Q | A | E | E | Y | L | H | C | A | D | L | L | Q | K | ..... | N | ..... | R | E | E | S | L | Y | V | K | N | T | M | G | W | L | Y | S | D | Q | S | M | S | T | L | A | I | R | H | L | S | E | V |
|------------------------------|-----|---|---|---|---|---|---|---|-------|---|---|---|---|-------|---|---|---|---|---|---|---|---|---|---|---|---|---|---|---|-------|---|---|---|---|---|---|---|---|---|---|---|---|---|---|---|-------|---|-------|---|---|---|---|---|---|---|---|---|---|---|---|---|---|---|---|---|---|---|---|---|---|---|---|---|---|---|---|---|---|---|
